# Supplementary material for: Identifying Factors to Facilitate the Implementation of Decision-Making Tools to Promote Self-Management of Chronic Diseases into Routine Healthcare Practice: A Qualitative Study
Source: MDPI journal article supplement (doi:10.3390/healthcare11172397), 2023-08-25
Supplement: s1 [file s1]

## Supplementary Materials Document S1– Semi-structured interview guideline

|        |                                                                                                                                                     |
|--------|-----------------------------------------------------------------------------------------------------------------------------------------------------|
| Number | 1. Question for decision-makers to interrogate concept<br>1.1 Questions to identify tangible enabling factors                                       |
| 1      | What are the different roles and responsibilities within your team for decision tool use?                                                           |
| 1.1    | Who should be involved in the clinical process to use the decision tools?                                                                           |
| 2      | Can you talk about the role of administrative staff in supporting decision tool use?                                                                |
| 2.1    | How do you build enthusiasm and support among administrative staff for a new process or way of working?                                             |
| 3      | How do you ensure that the whole team understands the purpose of a new process?                                                                     |
| 3.1    | How do you develop a shared understanding among your team about a new way of working?                                                               |
| 4      | Tell me about the role of clinical leaders in implementing new processes or ways of working, like decision tools                                    |
| 4.1    | What makes healthcare professionals want to drive changes in ways of working?                                                                       |
| 5      | Does the use of decision tools align well with your organisational priorities?                                                                      |
| 5.1    | How should decision tool use be measured?                                                                                                           |
| 6      | How far do the use of decision tools align with the way of working in your country's health system?                                                 |
| 7      | Does your reimbursement model affect the likelihood of decision tool use?                                                                           |
| 7.1    | Is the use of decision tools encouraged or discouraged by the way your work is funded?                                                              |
| 7.2    | What non-financial incentives would you need (legal requirements, patient welfare (purpose), workflow facilitation)? laws, policies, compensation)? |
| 8      | Does your reimbursement model (capitated, or FFS) capture activities like using a decision tool?                                                    |
| 9      | Does your country or region's health system performance assessment model take account of decision tools?                                            |
| 10     | Does the use of a decision tool by your provider have implications for other providers in your local system?                                        |

|        |                                                                                                                                |
|--------|--------------------------------------------------------------------------------------------------------------------------------|
| Number | 1. Question for healthcare professionals to interrogate concept<br>1.1 Questions to identify tangible enabling factors         |
| 1      | What type of patient is suitable for the use of a decision aid?                                                                |
| 1.1    | At what stage of a disease are such decision aids relevant for patients?                                                       |
| 2      | What are the different roles and responsibilities within your team for decision tool use?                                      |
| 2.1    | Who is important for the decision tool use in practice?                                                                        |
| 3      | Can you talk about the role of administrative staff in supporting decision tool use?                                           |
| 3.1    | How do you build enthusiasm and support among administrative staff for a new process or way of working?                        |
| 4.     | Tell me about the role of clinical leaders in implementing new processes or ways of working, like decision tools               |
| 4.1    | What makes healthcare professionals want to drive changes in ways of working?                                                  |
| 5      | How do you ensure that the whole team understands the purpose of a new process?                                                |
| 5.1    | How (what activities and strategies) do you develop a shared understanding among your team about a new way of working?         |
| 6      | How comfortable are you with using a decision tool?                                                                            |
| 6.1    | What training or support is needed to build confidence in using decision tools?                                                |
| 7      | How important is it that patients have prepared themselves to use the PtDA in a clinical consultation?                         |
| 7.1    | Tell me how to prepare patients to use a new tool like a PtDA                                                                  |
| 8      | How should patients be invited to use the PtDA while in a consultation?                                                        |
| 9      | At what point do healthcare professionals need to be informed and engaged about a decision tool?                               |
| 9.1    | When and how should healthcare professionals first see the decision tool?                                                      |
| 10     | Do you see yourself or your team as the most appropriate setting to use a decision tool, compared to another team or provider? |
| 10.1   | Who is the most appropriate healthcare professional to use a decision tool?                                                    |
